# Supplementary material for: Soil moisture dominates dryness stress on ecosystem production globally
Source: Nat Commun. 2020 Sep 29;11:4892. doi: 10.1038/s41467-020-18631-1 (PMC7524720; doi:10.1038/s41467-020-18631-1)
Supplement: Supplementary file 1 — supplementary information [file 41467_2020_18631_MOESM1_ESM.pdf]

Supplementary Information for “Soil moisture dominates dryness stress on  
ecosystem production globally” by Liu et al.

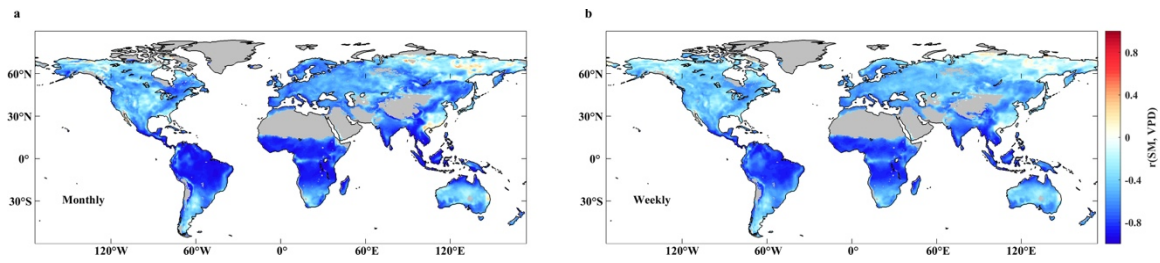

**Supplementary Figure 1.** Spatial distribution of Pearson's correlation coefficient between SM and VPD at (a) monthly and (b) weekly scale. Regions with sparse vegetation and regions without valid data are masked in gray.

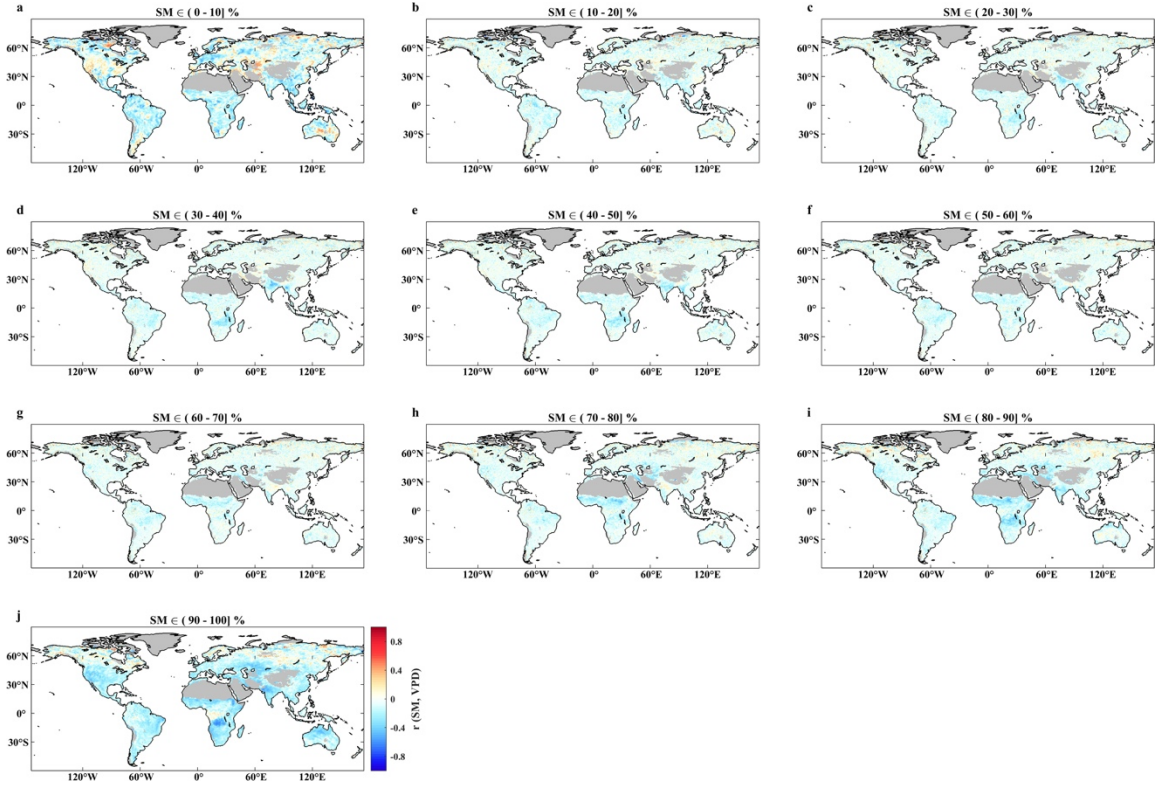

**Supplementary Figure 2.** Spatial distribution of Pearson's correlation coefficient between SM and VPD (i.e.,  $r(\text{SM}, \text{VPD})$ ) in (a-j) 0<sup>th</sup>-10<sup>th</sup>, 10<sup>th</sup>-20<sup>th</sup>, ..., 80<sup>th</sup>-90<sup>th</sup>, and 90<sup>th</sup>-100<sup>th</sup> percentiles of SM. Regions with sparse vegetation and regions without valid data are masked in gray.



**Supplementary Figure 3.** Spatial distribution of Pearson's correlation coefficient between SM and VPD (i.e.,  $r(\text{SM}, \text{VPD})$ ) in (a-j) 0<sup>th</sup>-10<sup>th</sup>, 10<sup>th</sup>-20<sup>th</sup>, ..., 80<sup>th</sup>-90<sup>th</sup>, and 90<sup>th</sup>-100<sup>th</sup> percentiles of VPD. Regions with sparse vegetation and regions without valid data are masked in gray.

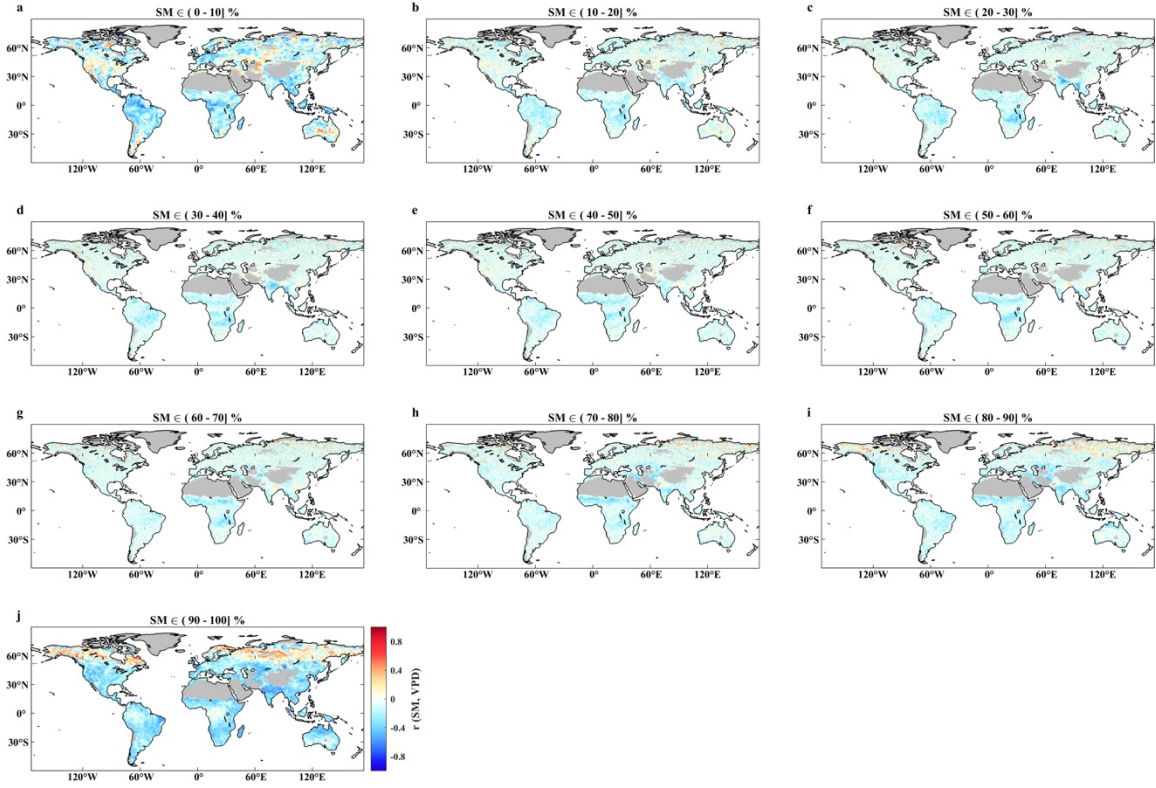

**Supplementary Figure 4.** Spatial distribution of Pearson's correlation coefficient between SM and VPD (i.e.,  $r(\text{SM}, \text{VPD})$ ) in (a-j) 0<sup>th</sup>-10<sup>th</sup>, 10<sup>th</sup>-20<sup>th</sup>, ..., 80<sup>th</sup>-90<sup>th</sup>, and 90<sup>th</sup>-100<sup>th</sup> percentiles of SM in 4-day bins. Regions with sparse vegetation and regions without valid data are masked in gray.

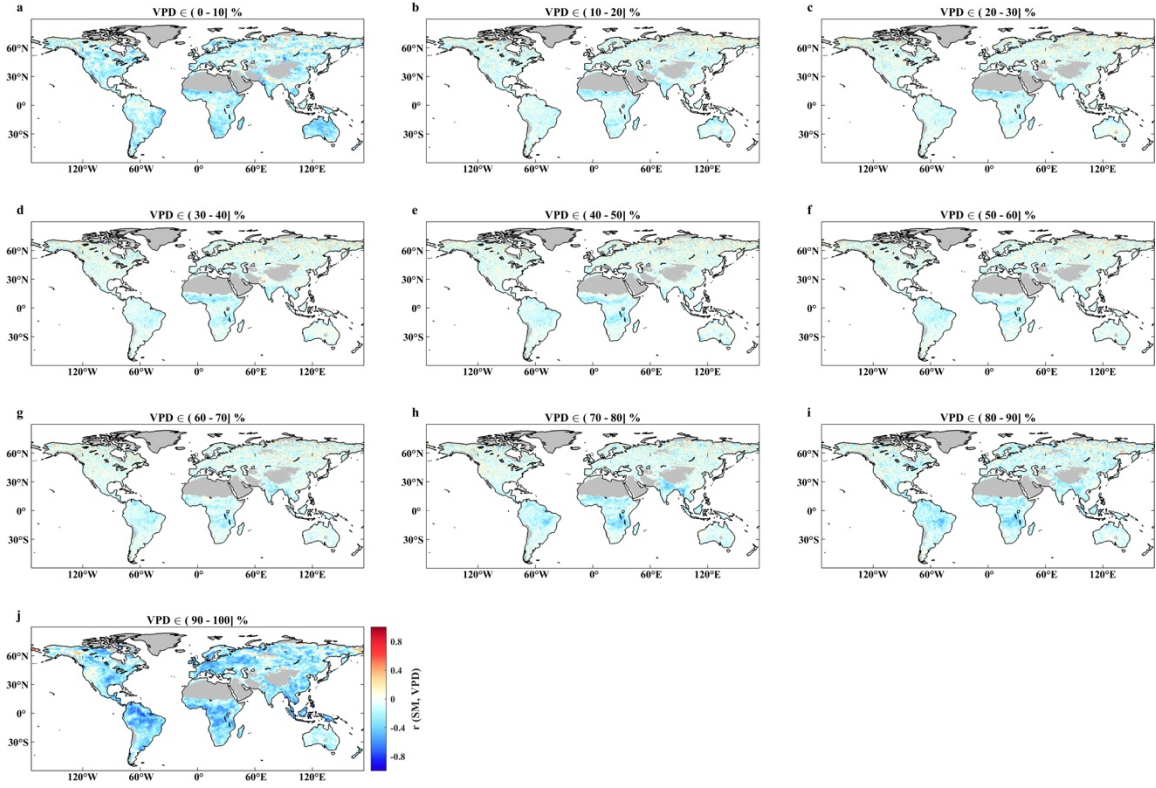

**Supplementary Figure 5.** Spatial distribution of Pearson's correlation coefficient between SM and VPD (i.e.,  $r(\text{SM}, \text{VPD})$ ) in (a-j) 0<sup>th</sup>-10<sup>th</sup>, 10<sup>th</sup>-20<sup>th</sup>, ..., 80<sup>th</sup>-90<sup>th</sup>, and 90<sup>th</sup>-100<sup>th</sup> percentiles of VPD in 4-day bins. Regions with sparse vegetation and regions without valid data are masked in gray.

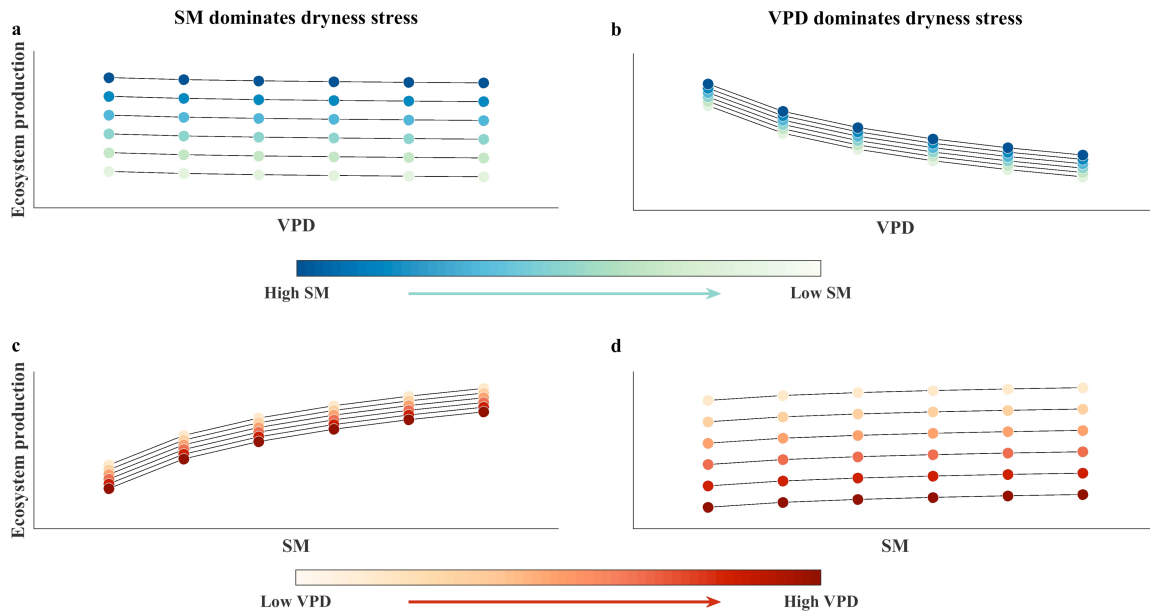

**Supplementary Figure 6.** Conceptual illustration of ecosystem productivity response to dryness under the condition of different dominating drivers. **a, c,** If SM dominates the dryness stress, higher VPD would not lead large decrease in ecosystem production, while lower SM can depress ecosystem production regardless of VPD variations. **b, d,** If VPD dominates the dryness stress, lower SM would not lead large decrease in ecosystem production, while higher VPD can depress ecosystem production regardless of SM variations.

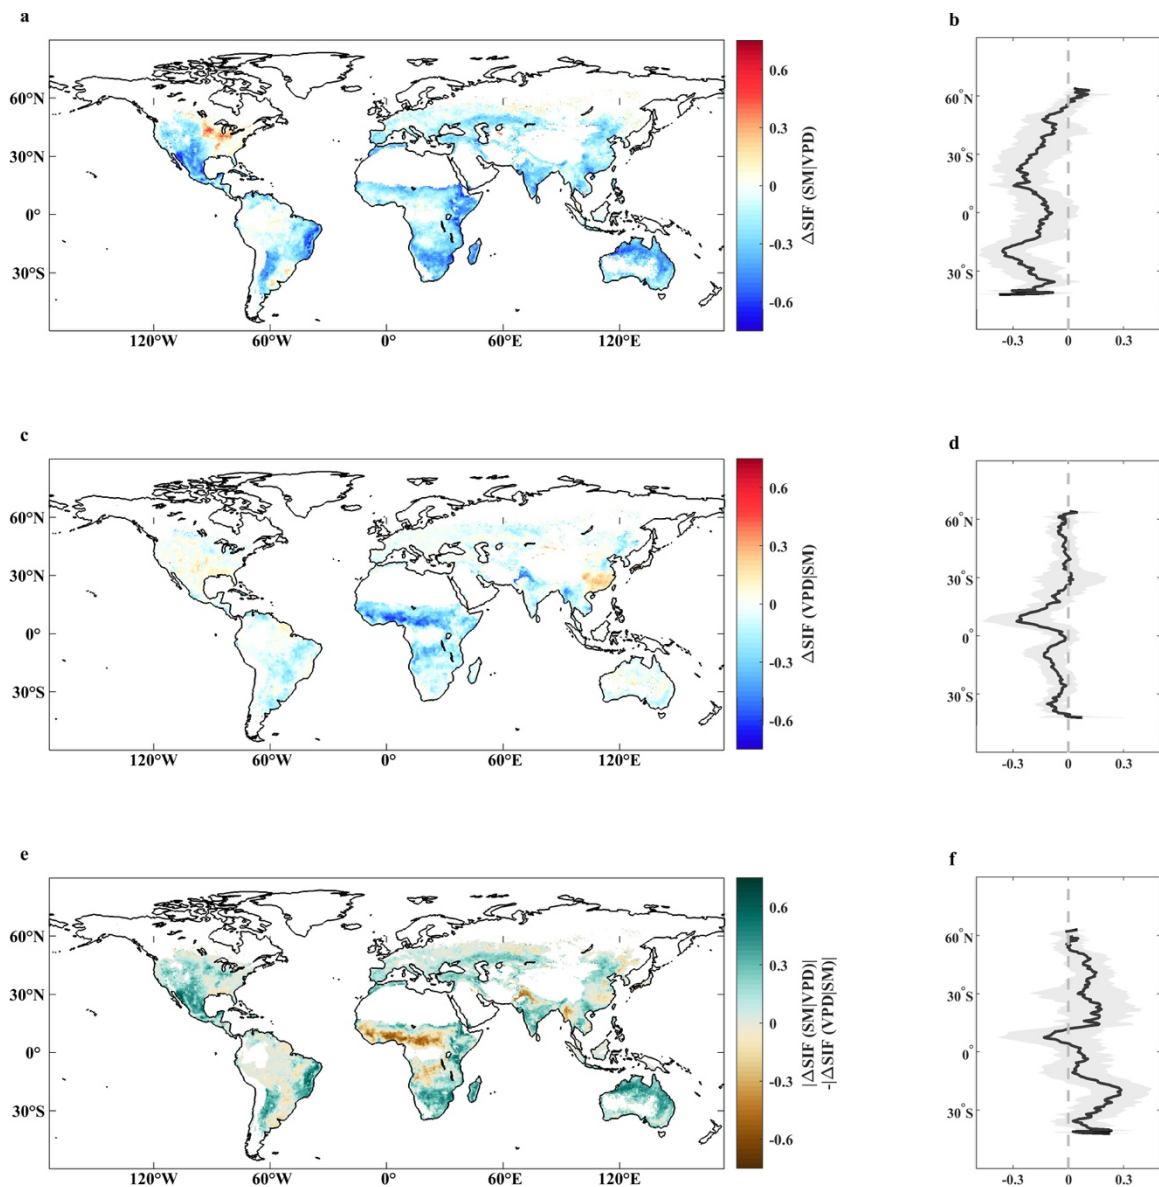

**Supplementary Figure 7.** Same as Fig. 4, but using MERRA-2 soil moisture and MERRA-2 VPD.

Black lines indicate the mean values, and gray shaded bands show the standard deviation.

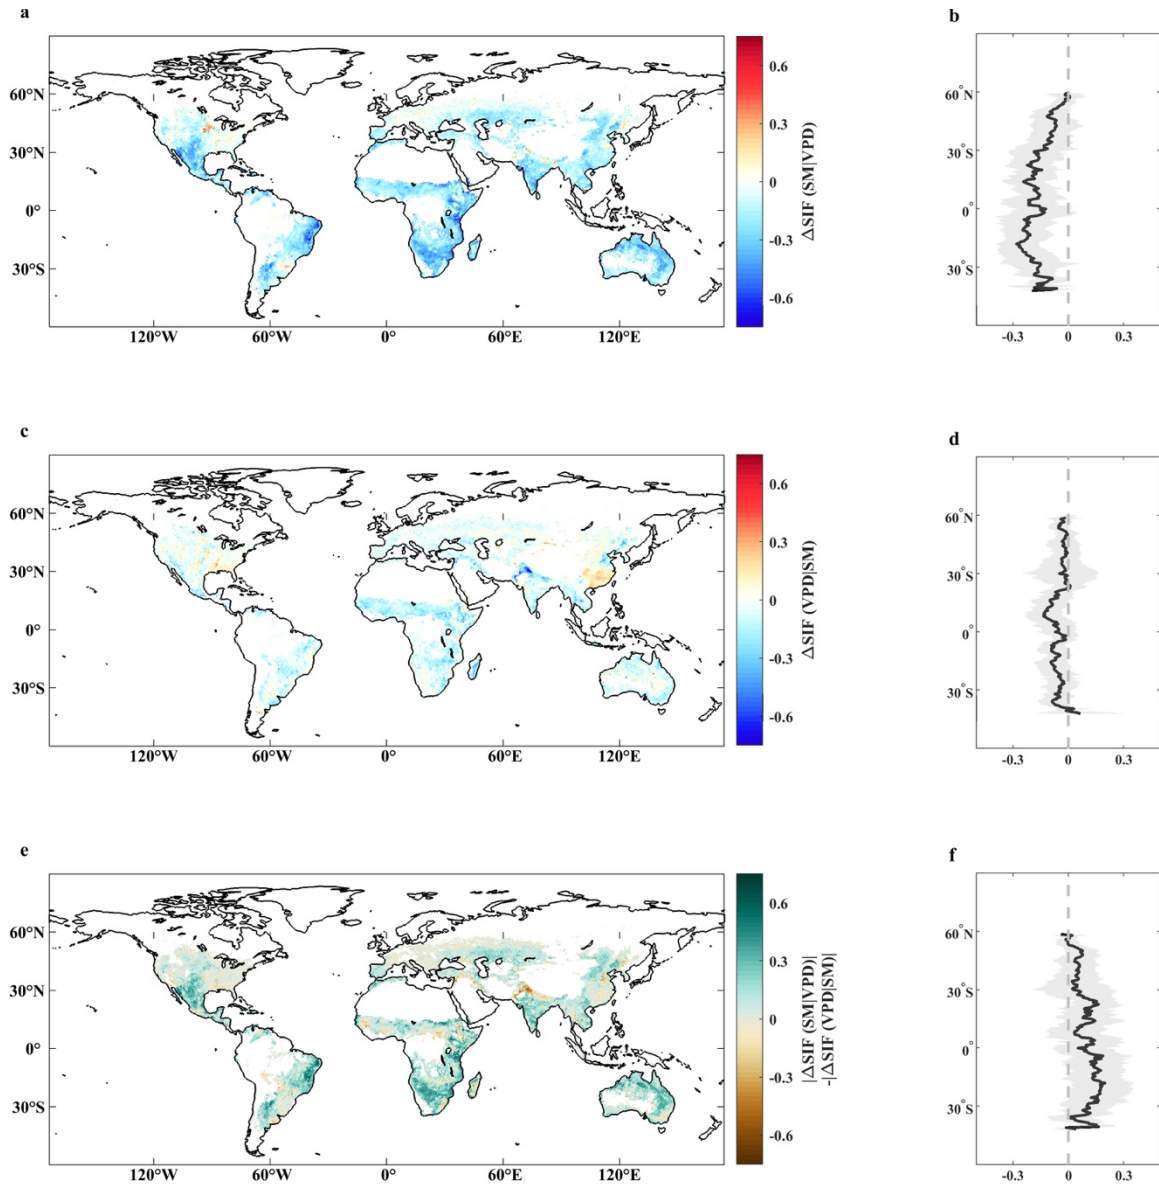

**Supplementary Figure 8.** Same as Fig. 4, but using ESA CCI soil moisture and ERA-Interim VPD.

Black lines indicate the mean values, and gray shaded bands show the standard deviation.

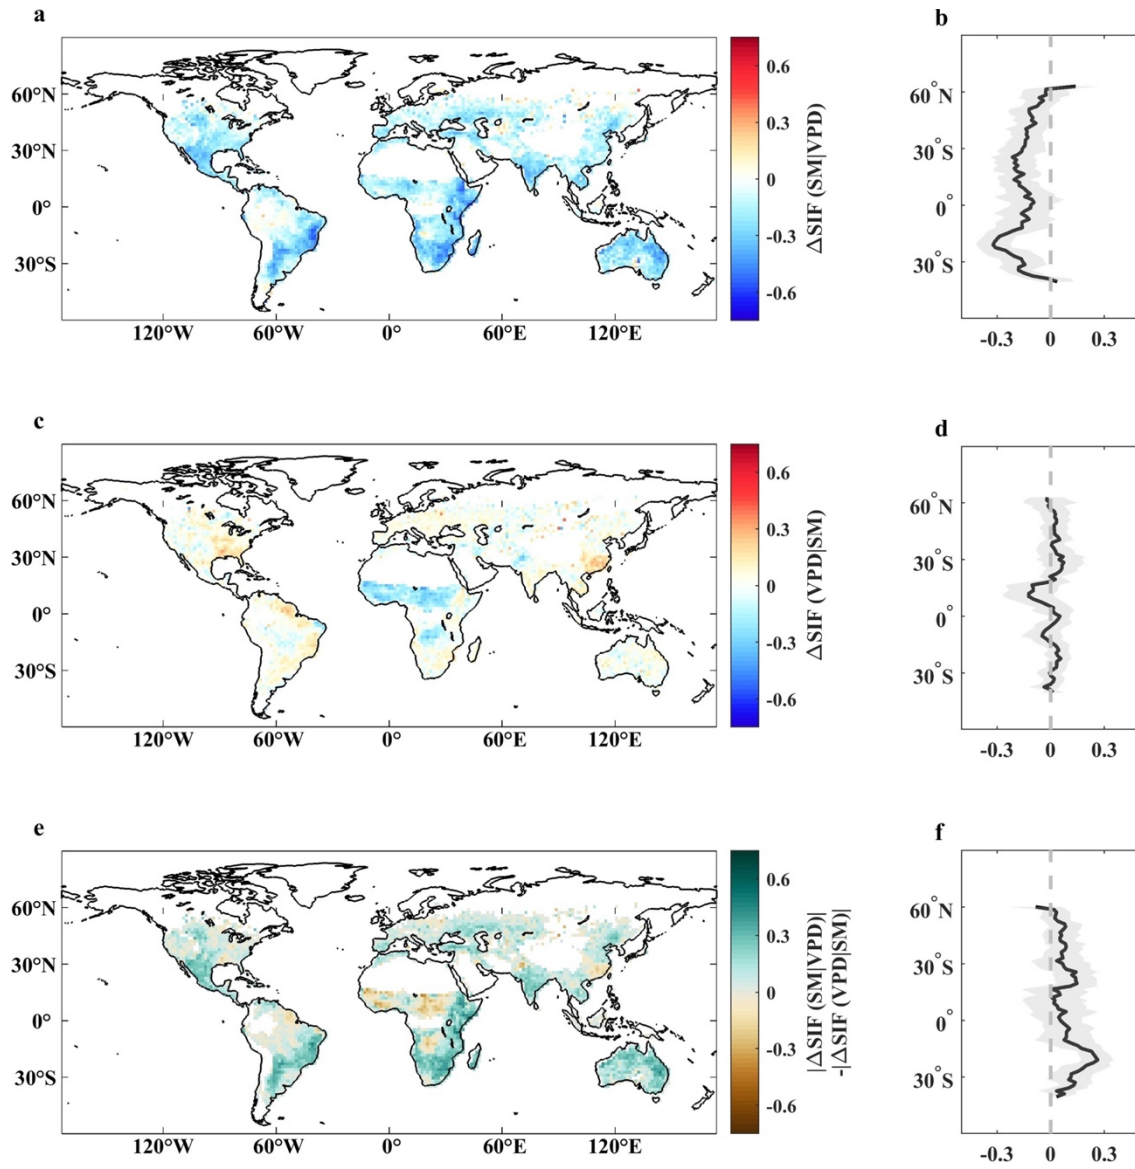

**Supplementary Figure 9.** Same as Fig. 4, but using the daily mean SCIAMACHY SIF and ERA-Interim soil moisture and VPD. Black lines indicate the mean values, and gray shaded bands show the standard deviation.

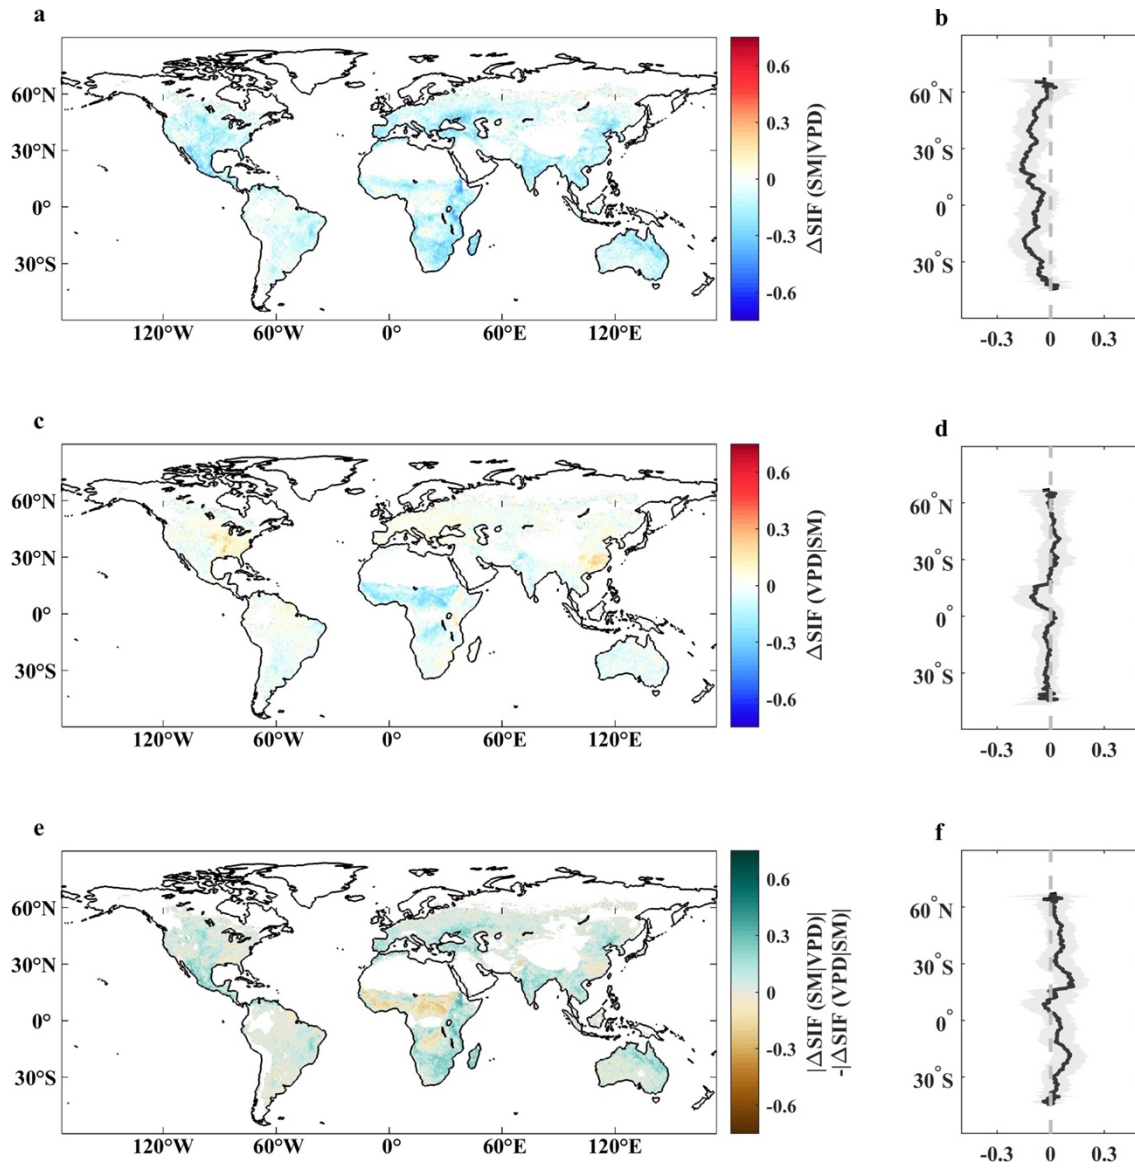

**Supplementary Figure 10.** Same as Fig. 4, but using the daily mean GOME-2 N28 SIF and ERA-Interim soil moisture and VPD. Black lines indicate the mean values, and gray shaded bands show the standard deviation.

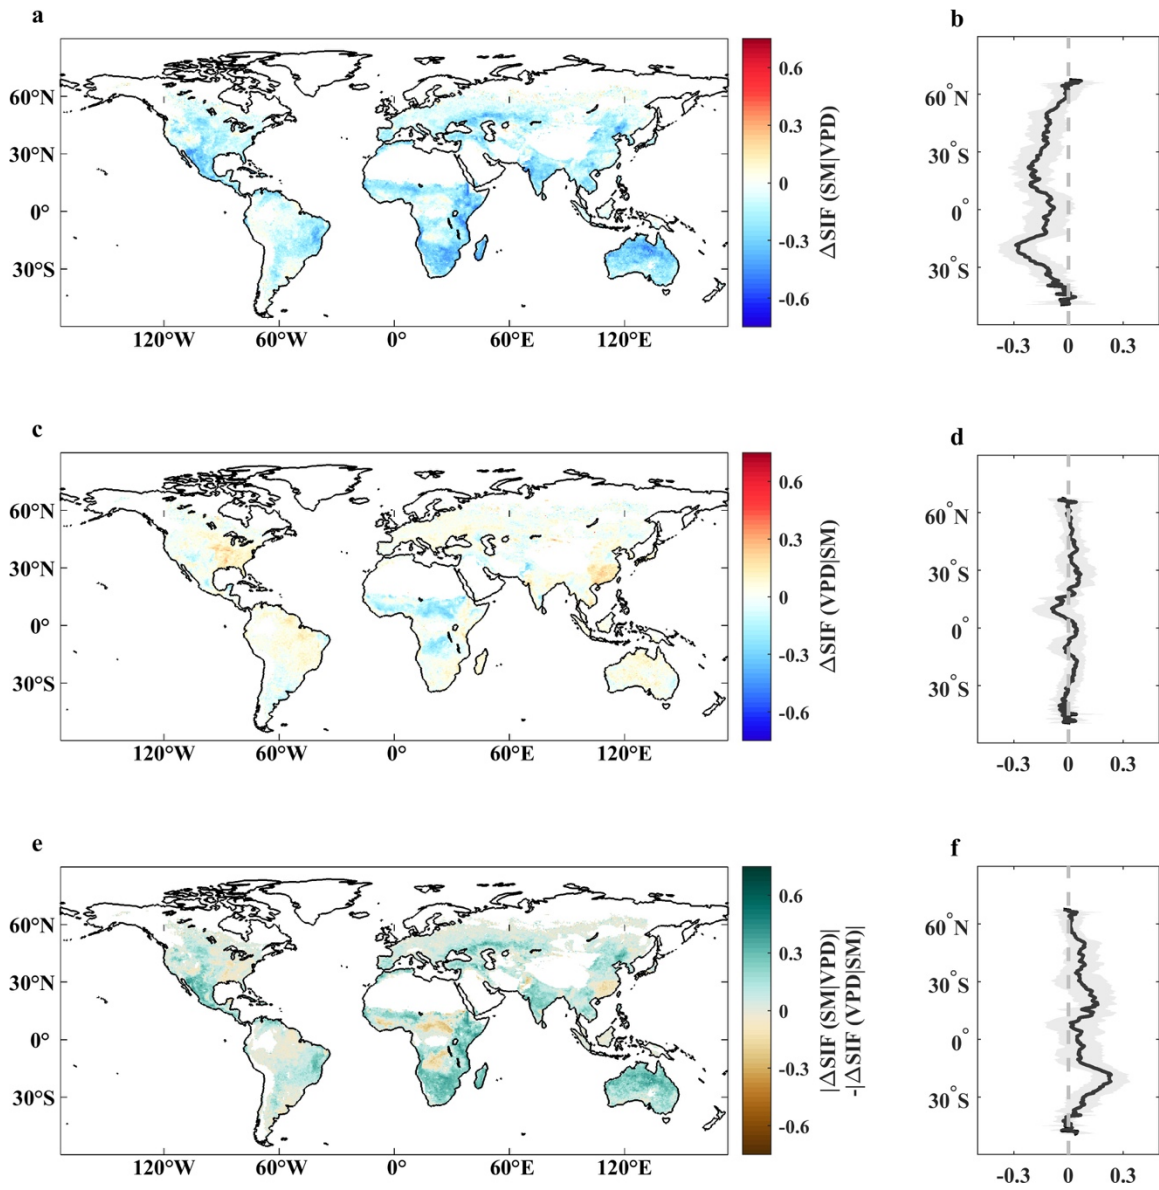

**Supplementary Figure 11.** Same as Fig. 4, but using the daily mean GOME-2 GFZ SIF and ERA-Interim soil moisture and VPD. Black lines indicate the mean values, and gray shaded bands show the standard deviation.

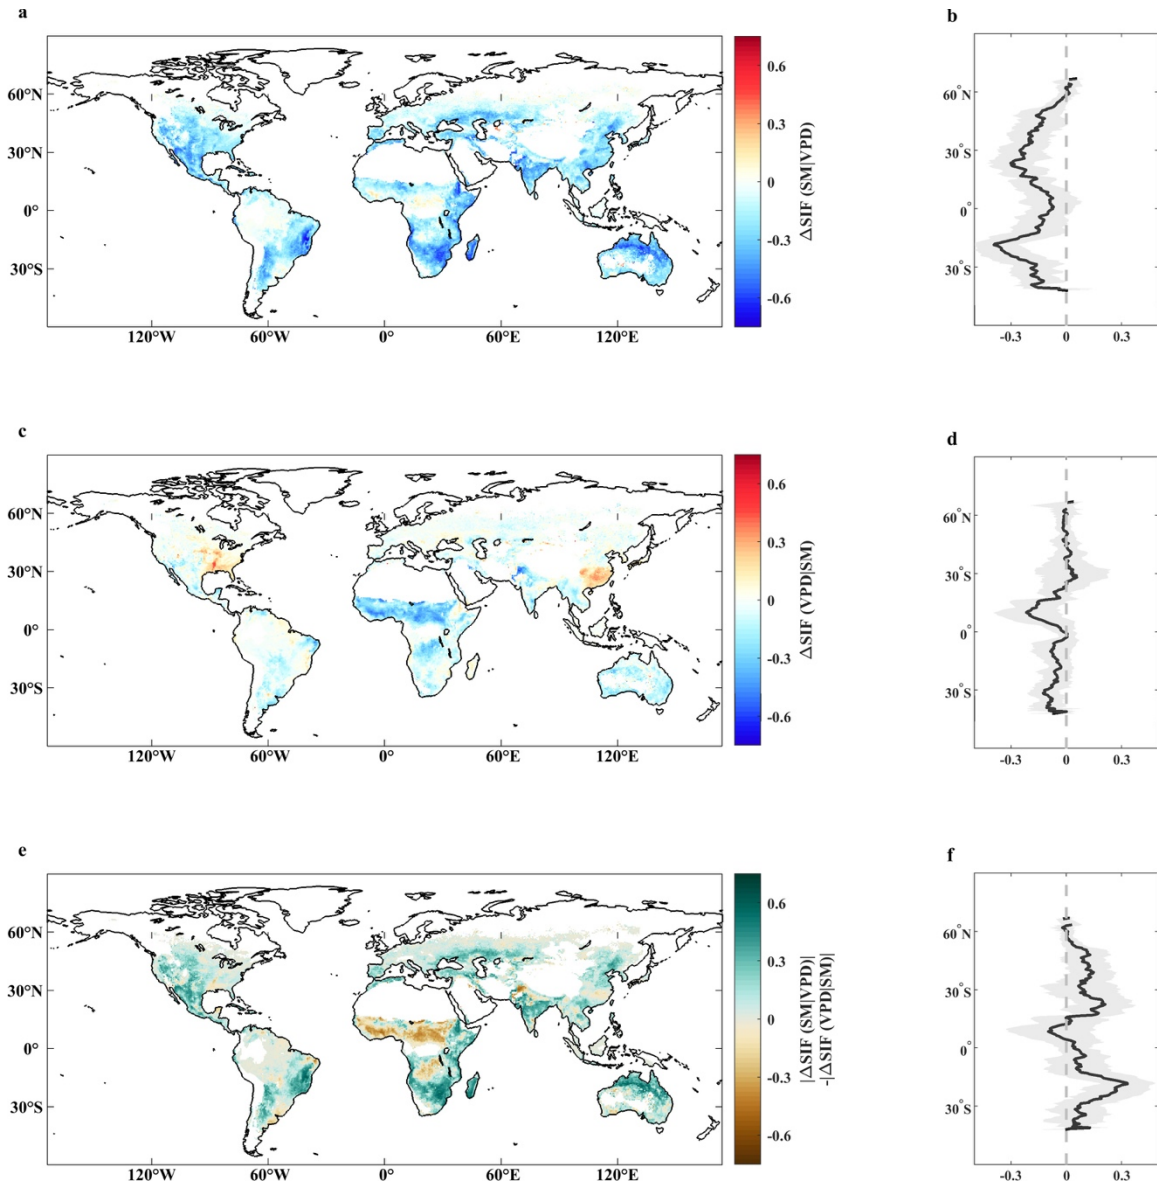

**Supplementary Figure 12.** Same as Fig. 4, but removing possible radiation effects by standardizing SIF by PAR. Black lines indicate the mean values, and gray shaded bands show the standard deviation.

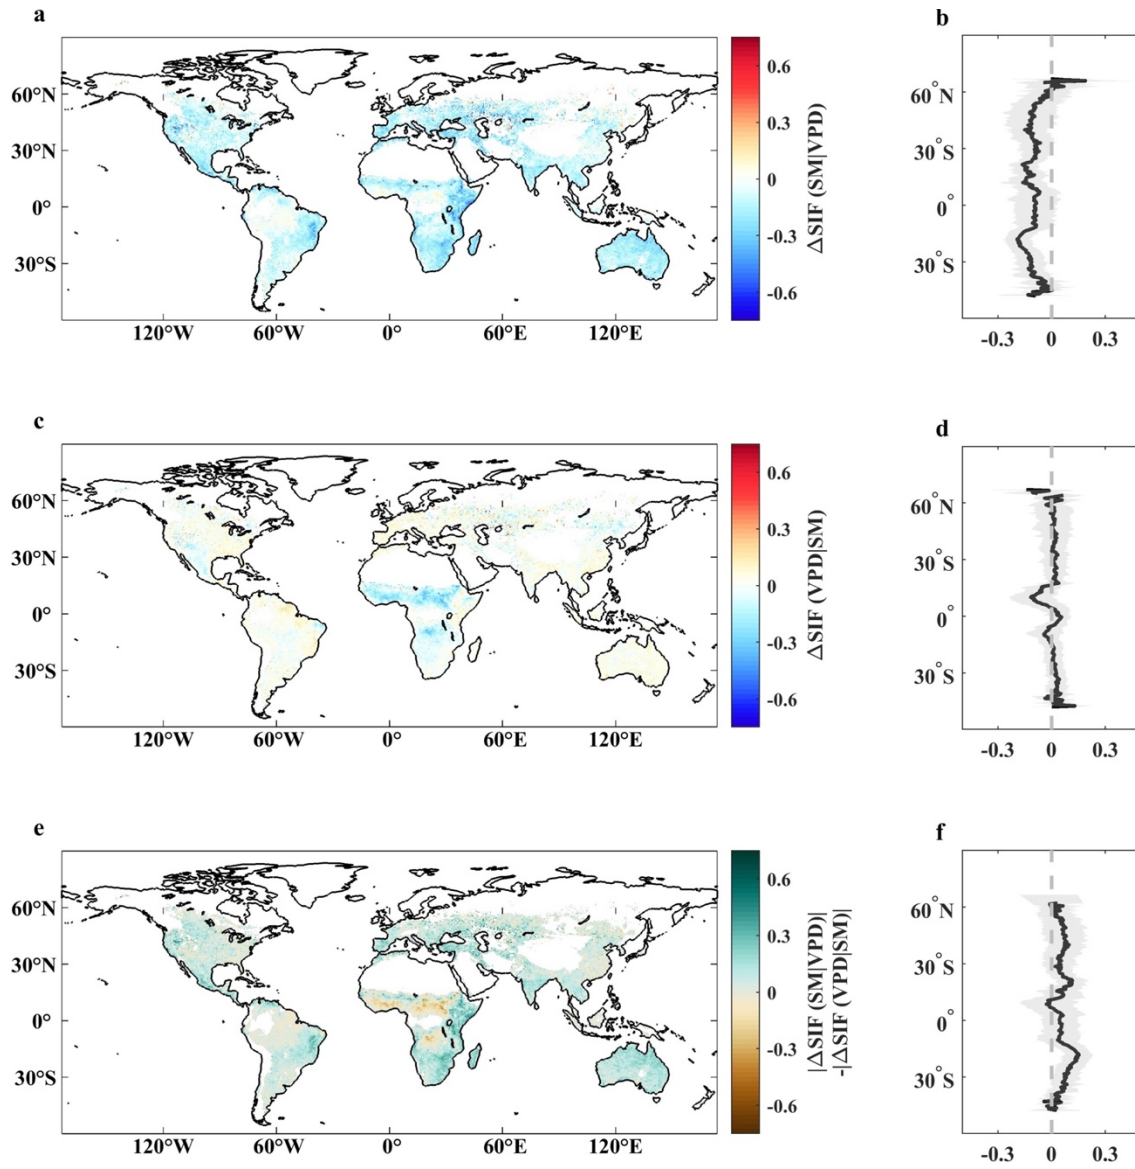

**Supplementary Figure 13.** Same as Fig. 4, but using the averaged estimates from narrow temperature ranges of 15°C-18°C, 18°C-21°C, 21°C-24°C, 24°C-27°C and 27°C-30°C and daily mean GOME-2 GFZ SIF. Black lines indicate the mean values, and gray shaded bands show the standard deviation.

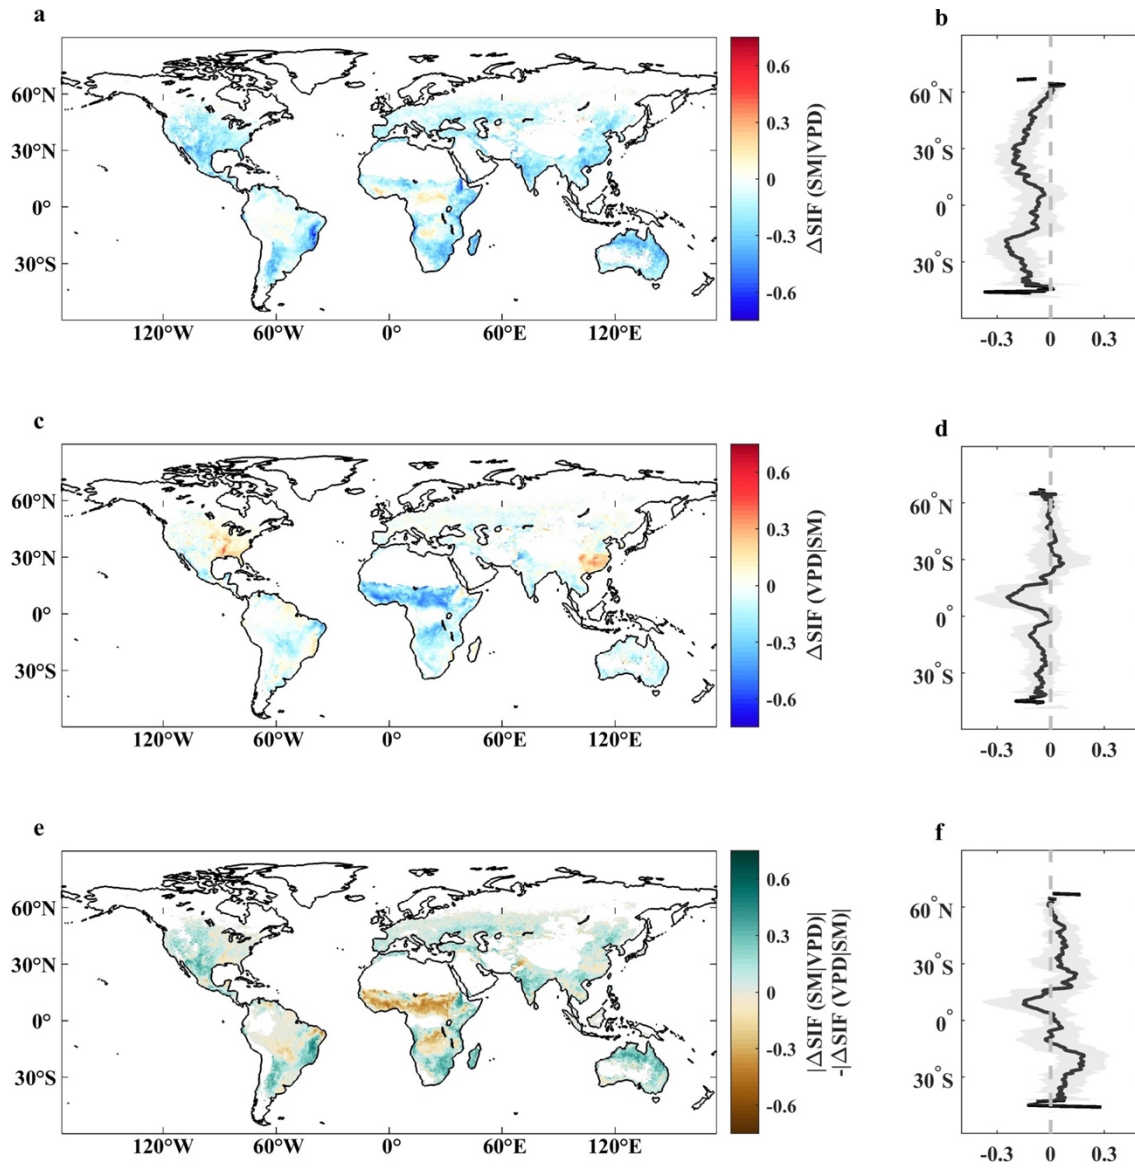

**Supplementary Figure 14.** Same as Fig. 4, but using the aggregated 8-days CSIF. Black lines indicate the mean values, and gray shaded bands show the standard deviation.

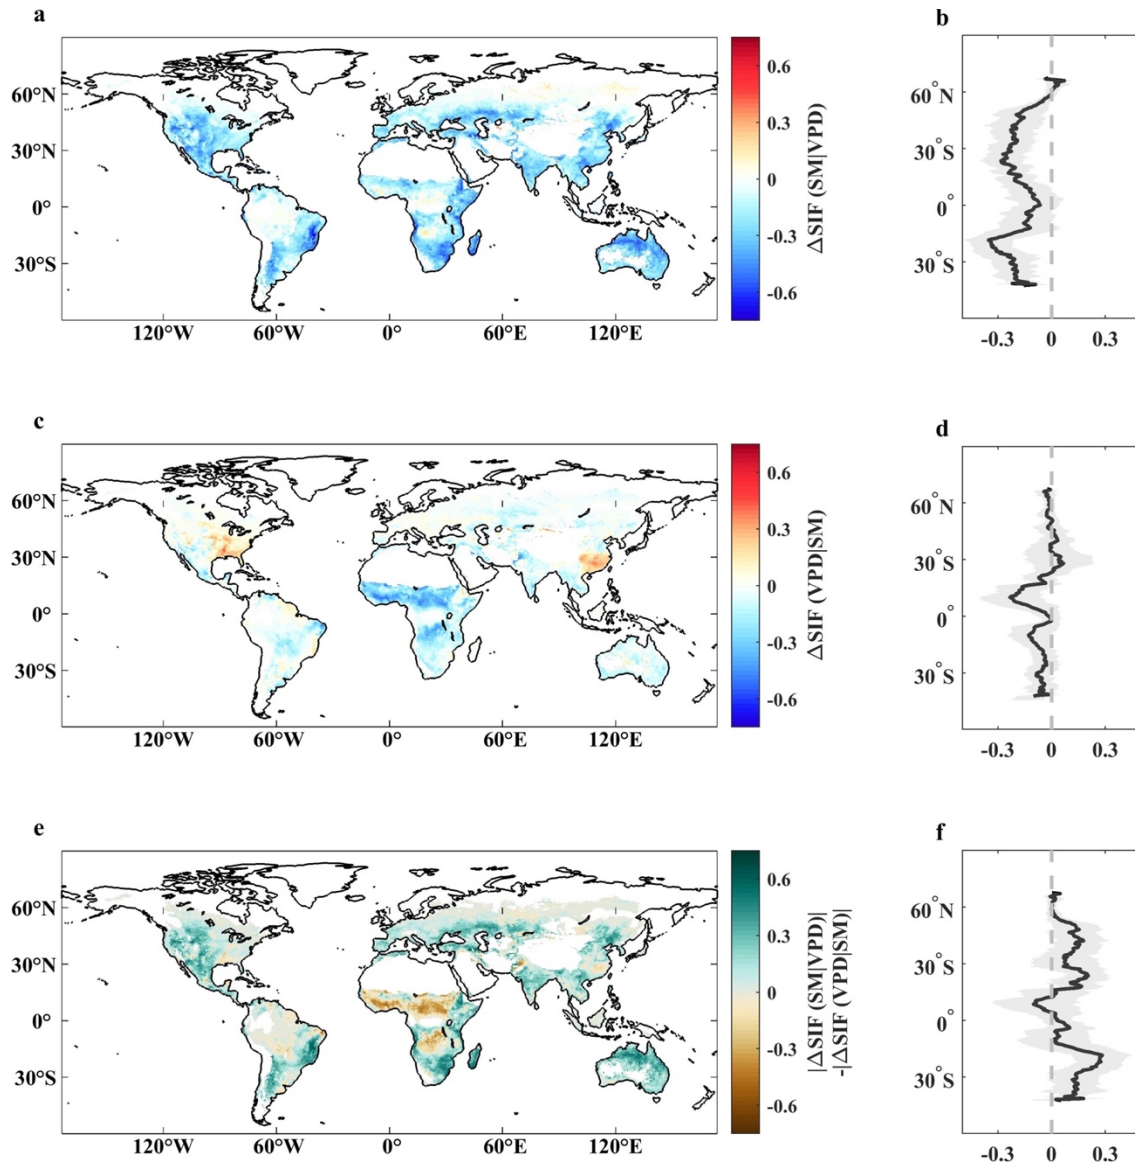

**Supplementary Figure 15.** Same as Fig. 4, but using 20 percentile bins. Black lines indicate the mean values, and gray shaded bands show the standard deviation.

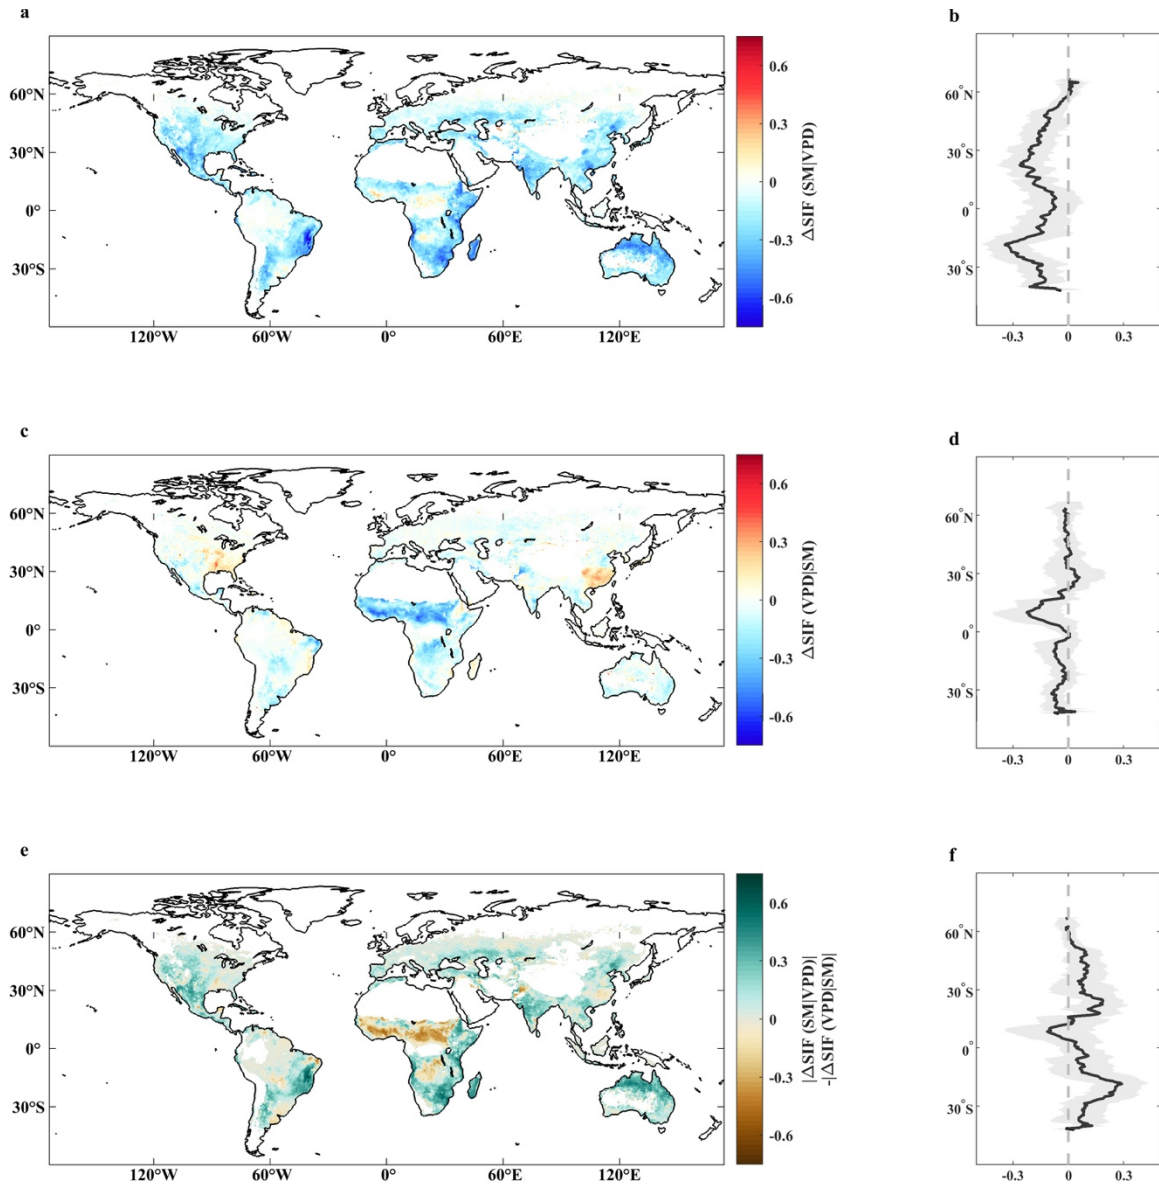

**Supplementary Figure 16.** Same as Fig. 4, but using the linear regression approach. Black lines indicate the mean values, and gray shaded bands show the standard deviation.

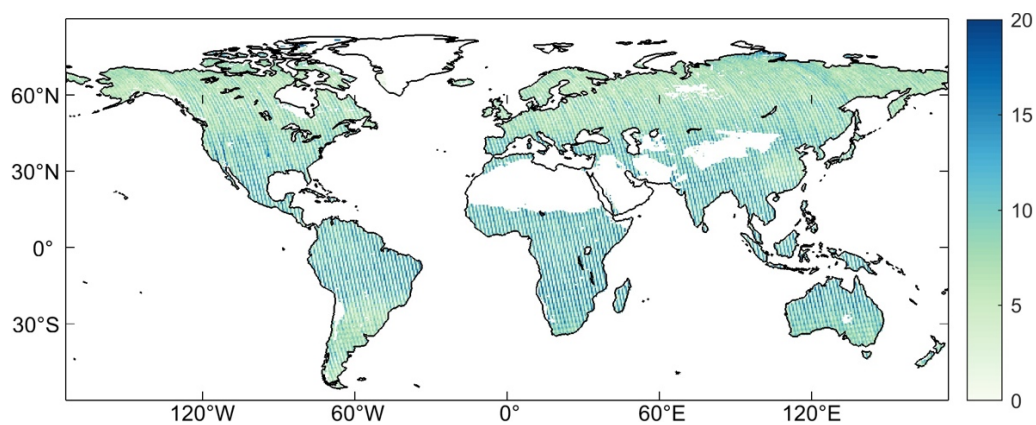

**Supplementary Figure 17.** Global maps of the average number of aggregated OCO-2 SIF observations after data filtering at  $0.5^\circ \times 0.5^\circ$  per year. The aggregation only includes the OCO-2 retrievals that pass the quality criteria (documented in OCO-2 Lite files).

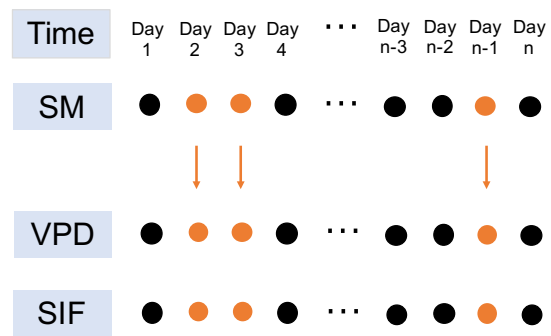

**Supplementary Figure 18.** Illustration of the binning procedure effect on temporal match. The orange dots indicate all data in one SM bin.

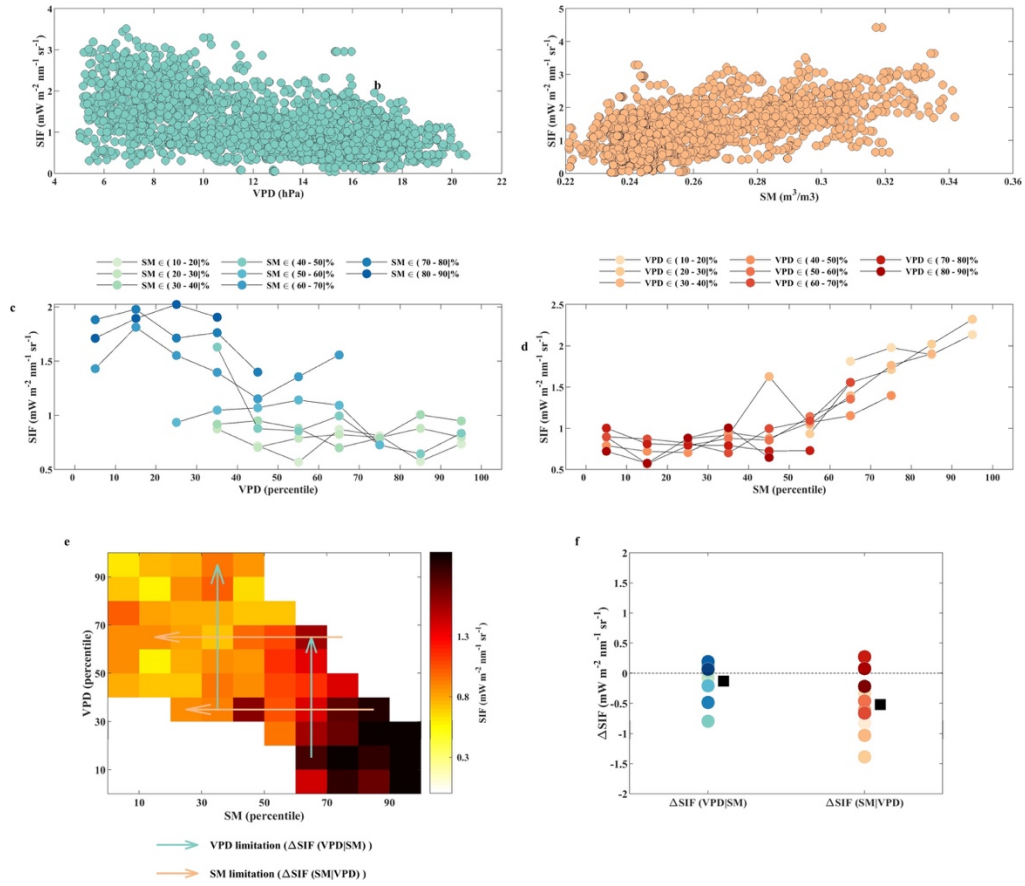

**Supplementary Figure 19.** Same as Figure 3, but using the pixel located at Brazil (4.25°S, 40.25°W) and GOME-2 GFZ SIF.

**Supplementary Table 1.** Classification of aridity regions based on aridity index.

| Value    | Climate Class |
|----------|---------------|
| <0.05    | Hyper Arid    |
| 0.05-0.2 | Arid          |
| 0.2-0.5  | Semi-arid     |
| 0.5-0.75 | Sub-humid     |
| >0.75    | Humid         |

**Supplementary Table 2.** Dataset name and access links.

| <b>Dataset name</b>                     | <b>Data access</b>                                                                                                                                                                        |
|-----------------------------------------|-------------------------------------------------------------------------------------------------------------------------------------------------------------------------------------------|
| Gome-2 GFZ SIF                          | <a href="ftp://ftp.gfz-potsdam.de/home/mefe/GlobFluo/GOME-2/">ftp://ftp.gfz-potsdam.de/home/mefe/GlobFluo/GOME-2/</a> , accessed on 12 November 2018                                      |
| Gome-2 N28 SIF                          | <a href="https://avdc.gsfc.nasa.gov/pub/data/satellite/MetOp/GOME_F/v28/">https://avdc.gsfc.nasa.gov/pub/data/satellite/MetOp/GOME_F/v28/</a>                                             |
| SCIAMACHY SIF                           | <a href="ftp://ftp.gfz-potsdam.de/home/mefe/GlobFluo/SCIAMACHY/">ftp://ftp.gfz-potsdam.de/home/mefe/GlobFluo/SCIAMACHY/</a> , accessed on 12 November 2018                                |
| OCO-2 CSIF                              | <a href="https://figshare.com/articles/CSIF/6387494">https://figshare.com/articles/CSIF/6387494</a>                                                                                       |
| ERA-Interim                             | <a href="https://www.ecmwf.int/en/forecasts/datasets/reanalysis-datasets/era-interim">https://www.ecmwf.int/en/forecasts/datasets/reanalysis-datasets/era-interim</a>                     |
| MEERA-2                                 | <a href="https://gmao.gsfc.nasa.gov/reanalysis/MERRA-2/data_access/">https://gmao.gsfc.nasa.gov/reanalysis/MERRA-2/data_access/</a>                                                       |
| ESA CCI, version 04.4                   | <a href="https://www.esa-soilmoisture-cci.org/index.php?q=node/145">https://www.esa-soilmoisture-cci.org/index.php?q=node/145</a>                                                         |
| CERES_SYN1deg_Ed4A                      | <a href="https://ceres-tool.larc.nasa.gov/ord-tool/jsp/SYN1degEd4Selection.jsp">https://ceres-tool.larc.nasa.gov/ord-tool/jsp/SYN1degEd4Selection.jsp</a>                                 |
| Climate Research Unit, version 4.01     | <a href="https://crudata.uea.ac.uk/cru/data/hrg/">https://crudata.uea.ac.uk/cru/data/hrg/</a>                                                                                             |
| Global forest change (GFC), version 1.6 | <a href="https://earthenginepartners.appspot.com/science-2013-global-forest/download_v1.6.html">https://earthenginepartners.appspot.com/science-2013-global-forest/download_v1.6.html</a> |
| MODIS MCD12Q1                           | <a href="https://modis.gsfc.nasa.gov/data/dataproduct/mod12.php">https://modis.gsfc.nasa.gov/data/dataproduct/mod12.php</a>                                                               |
